# Supplementary material for: Female and Male Perspectives on the Neolithic Transition in Europe: Clues from Ancient and Modern Genetic Data
Source: PLOS journal article supplement (doi:10.1371/journal.pone.0060944), 2013-04-17
Supplement: S10 (10.1371/journal.pone.0060944.s010) [file journal.pone.0060944.s010]

**Table S1. Demographic parameters estimated under the Split with Differential Growth (SDG) model.**

|                                            |        | <b><math>\omega</math> Median</b> | <b><math>\omega</math> 5% Perc.</b> | <b><math>\omega</math> 95% Perc.</b> | <b>Prior</b>     |
|--------------------------------------------|--------|-----------------------------------|-------------------------------------|--------------------------------------|------------------|
| <b><math>N_e</math> Neolithic</b>          | Total  | 18,374.80                         | 3,529.00                            | 77,274.60                            | U: 1,000-100,000 |
|                                            | Deme 1 | 967.10                            | 185.74                              | 4,067.09                             |                  |
|                                            | Deme 2 | 17,407.70                         | 3,343.26                            | 73,207.51                            |                  |
|                                            |        |                                   |                                     |                                      |                  |
| <b><math>N_e</math> Upper Palaeolithic</b> | Total  | 2,248.12                          | 297.64                              | 4,717.56                             | U: 10-5,000      |
|                                            | Deme 1 | 1,124.06                          | 148.82                              | 2,358.78                             |                  |
|                                            | Deme 2 | 1,124.06                          | 148.82                              | 2,358.78                             |                  |

Weighted ( $\omega$ ) median, 5% and 95% percentiles values are represented for the  $N_e$  at the Neolithic and Upper Palaeolithic. Deme 1 and 2 correspond to the demes without and with differential growth, respectively (see Figure S9).
