# Supplementary material for: Female and Male Perspectives on the Neolithic Transition in Europe: Clues from Ancient and Modern Genetic Data
Source: PLOS journal article supplement (doi:10.1371/journal.pone.0060944), 2013-04-17
Supplement: S11 (10.1371/journal.pone.0060944.s011) [file journal.pone.0060944.s011]

**Table S2. Maximum probability of obtaining genetic differentiation ( $F_{ST}$ ) values larger than those observed in the real data.**

| Models                          | $P_{s>o}$             |                      |                   |
|---------------------------------|-----------------------|----------------------|-------------------|
|                                 | <i>HG</i> vs. Farmers | <i>HG</i> vs. Modern | Farmer vs. Modern |
| TP (this study)                 | 0.018                 | 0.032                | 0.152             |
| TP (Bramanti <i>et al.</i> [5]) | 0.022                 | 0.028                | -                 |
| S                               | 0.132                 | 0.278                | 0.192             |
| SDG                             | 0.990                 | 1.000                | 0.612             |

Maximum probability values of obtaining a simulated  $F_{ST}$  value higher than that observed ( $P_{s>o}$ ), for each of the models (TP - Total Panmixia, S - Split, SDG - Split with Differential Growth) and pairwise comparisons analysed (see Figure 3). See Text S1 for more details and reference information.
