# Supplementary material for: Female and Male Perspectives on the Neolithic Transition in Europe: Clues from Ancient and Modern Genetic Data
Source: PLOS journal article supplement (doi:10.1371/journal.pone.0060944), 2013-04-17
Supplement: S12 (10.1371/journal.pone.0060944.s012) [file journal.pone.0060944.s012]

**Table S3. Validation of the ABC model selection procedure.**

|     | % Attribution |      |      |
|-----|---------------|------|------|
|     | TP            | S    | SDG  |
| TP  | 74.7          | 21.3 | 4.0  |
| S   | 44.7          | 38.1 | 17.2 |
| SDG | 2.6           | 9.6  | 87.8 |

Each row corresponds to the percentage of times that a model (TP - Total Panmixia, S - Split, SDG - Split with Differential Growth) was assigned to each of the models, by a higher posterior probability. When data are simulated under the S model our results show that a significant proportion of the data sets are identified as being generated under another model (and as many as 44.7% are assigned to the TP model). This is less the case for the data generated under the TP model (but still they represent as much as 25% altogether) and even less under the SDG model. Thus despite non negligible error rates, these simulations suggest that there is a bias favouring the TP model, and much less the S and SDG models. One reason for this is that the ABC algorithm used here followed the procedure of Bramanti and colleagues [5], and was only based on three statistics, which were available. However, the results also show that the SDG model is the model which is most easily identified with nearly 88% of positive results. Given that the results obtained from the real data provide no support for the TPM, and less than 5% for the S model, we are confident that the inference of the model is unlikely to be incorrect hence demonstrating the importance of differential growth. This explains why Haak *et al.* [6] were unable to explain the observed  $F_{ST}$  values with their split model. See Text S1 for more details and reference information.
